# Supplementary material for: The effect of local species composition on the distribution of an avian invader
Source: PubMed Central journal article supplement (PMC6825180; doi:10.1038/s41598-019-52256-9), 2019-11-01
Supplement: 41598_2019_52256_MOESM1_ESM.pdf [file 41598_2019_52256_MOESM1_ESM.pdf]

**Supplementary material for:**

The effect of local species composition on the distribution of an avian invader

Tali Magory Cohen\*<sup>1</sup> & Roi Dor\*<sup>1</sup>

*<sup>1</sup> School of Zoology, Faculty of Life Sciences, Tel Aviv University, Tel Aviv 69978, Israel*

**\*Correspondence:** [roidor@tauex.tau.ac.il](mailto:roidor@tauex.tau.ac.il), [talimagory@gmail.com](mailto:talimagory@gmail.com)

**Appendix 1**

**Tables S1, S2, S3**

**Figures S1, S2**

## Tables

**Table S1.** Details of the resources used to collect species occurrence records used in this study.

| Type                               | Source                                                                                                                                      |
|------------------------------------|---------------------------------------------------------------------------------------------------------------------------------------------|
| Online database                    | Global Biodiversity Information Facility (GBIF) (GBIF.org 2015), VertNet (vertnet.org. 2015), SABAP2 <sup>3</sup>                           |
| Previous studies                   | Holzapfel et al. 2006                                                                                                                       |
| Governmental agencies <sup>^</sup> | Israel Nature and Park Authority (INPA)                                                                                                     |
| Citizen Science project*           | Birders, schools, amateur birders                                                                                                           |
| Non-Government Organizations       | The Israeli Center for Yardbirds, HaMaarag – Israel’s National Ecosystem Assessment Program, Society for the Protection of Nature in Israel |
| Museums                            | The Steinhardt Museum of Natural History, Israel                                                                                            |
| Personal observations              | Research team                                                                                                                               |
| Personal correspondence            | C. Holzapfel                                                                                                                                |

<sup>^</sup> © Data – Department of Information Systems, INPA

\* In collaboration with The Israeli Center for Yardbirds

**Table S2.** Home ranges of the species used in the study. References include the source for this value; when no exact information for the species was available, a close relative was used, indicated prior to the reference. N – number of observations.

| <b>Common name</b>       | <b>Abbreviation</b>              | <b>N before spatial filtering</b> | <b>N after spatial filtering</b> | <b>Home range [km]</b> | <b>Reference</b> |                                  |
|--------------------------|----------------------------------|-----------------------------------|----------------------------------|------------------------|------------------|----------------------------------|
| Common myna              | <i>Acridotheres tristis</i>      | MYN                               | 7,896                            | 762                    | 3 <sup>5</sup>   |                                  |
| Hooded crow              | <i>Corvus cornix</i>             | HCR                               | 21,181                           | 7,181                  | 6.4              | American crow; <sup>6</sup>      |
| Western jackdaw          | <i>Corvus monedula</i>           | JAC                               | 4,005                            | 1,368                  | 6.4              | American crow; <sup>6</sup>      |
| House sparrow            | <i>Passer domesticus</i>         | HSP                               | 17,831                           | 6,613                  | 2                | <sup>7</sup>                     |
| Rose-ringed parakeet     | <i>Psittacula krameri</i>        | ROS                               | 11,935                           | 4,734                  | 1.2              | <sup>8</sup>                     |
| Vinous-breasted starling | <i>Acridotheres burmannicus</i>  | VST                               | 236                              | 133                    | 3                | Common myna; <sup>5</sup>        |
| Monk parakeet            | <i>Myiopsitta monachus</i>       | MON                               | 1,304                            | 645                    | 1.2              | Rose ringed parrot; <sup>8</sup> |
| Syrian woodpecker        | <i>Dendrocopos syriacus</i>      | WOO                               | 7,406                            | 1,654                  | 0.089            | <sup>9</sup>                     |
| Eurasian hoopoe          | <i>Upupa epops</i>               | HOO                               | 8,521                            | 2,860                  | 0.7              | <sup>10</sup>                    |
| Great tit                | <i>Parus major</i>               | TIT                               | 10,252                           | 2,739                  | 0.134            | <sup>11</sup>                    |
| Tristram's starling      | <i>Onychognathus tristramii</i>  | TRI                               | 3,013                            | 866                    | 14.25            | <sup>12</sup>                    |
| Domestic pigeon          | <i>Columba livia</i>             | PIG                               | 10,401                           | 4,330                  | 0.09             | <sup>13</sup>                    |
| Laughing dove            | <i>Streptopelia senegalensis</i> | LAU                               | 15,137                           | 5,261                  | 0.09             | Domestic pigeon; <sup>13</sup>   |

**Table S3.** Mean regression coefficients of the probit model for each environmental predictor for each species.

| <b>Species</b>           | <b>Intercept</b> | <b>BIO4</b> | <b>BIO11</b> | <b>BIO17</b> | <b>HD</b> | <b>IMP</b> |
|--------------------------|------------------|-------------|--------------|--------------|-----------|------------|
| Common myna              | -1.80            | -0.28       | 0.31         | 0.13         | 0.29      | 0.36       |
| Syrian woodpecker        | -3.34            | -0.32       | -0.05        | 0.22         | 0.07      | 0.02       |
| Hooded crow              | 0.13             | -0.39       | 0.15         | 0.37         | 0.00      | 0.16       |
| Great tit                | -3.12            | -0.37       | -0.02        | 0.18         | 0.04      | 0.06       |
| Tristram's starling      | -0.11            | 0.98        | -0.03        | -0.07        | 0.15      | -0.01      |
| Vinous-breasted starling | -3.90            | -0.45       | 0.36         | 0.14         | 0.22      | 0.15       |
| Rose-ringed parakeet     | -2.02            | -0.30       | 0.32         | 0.29         | 0.16      | 0.23       |
| Monk parakeet            | -3.08            | -0.27       | 0.26         | 0.06         | 0.15      | 0.21       |
| House sparrow            | -1.01            | 0.04        | 0.23         | 0.23         | 0.11      | 0.33       |
| Western jackdaw          | -0.52            | -0.20       | 0.12         | 0.25         | 0.56      | 0.02       |
| Eurasian hoopoe          | -1.72            | -0.08       | 0.20         | 0.09         | 0.07      | 0.16       |
| Laughing dove            | -2.85            | 0.14        | 0.17         | 0.26         | 0.04      | 0.13       |
| Domestic pigeon          | -2.92            | 0.01        | 0.14         | 0.14         | 0.02      | 0.16       |

## Figures

**Figure S1.** Response curves created by a MaxEnt model. The curves show the mean response of the 100 replicate MaxEnt runs (marked in red) surrounded by mean +/- one standard deviation marked in blue. These responses are created individually by different models using only the corresponding variable and show its effect on the logistic prediction made by the model. Predictors abbreviations are detailed in Table S2.

Logistic Output (Probability of Presence)

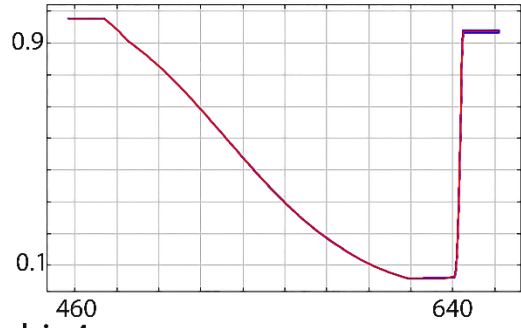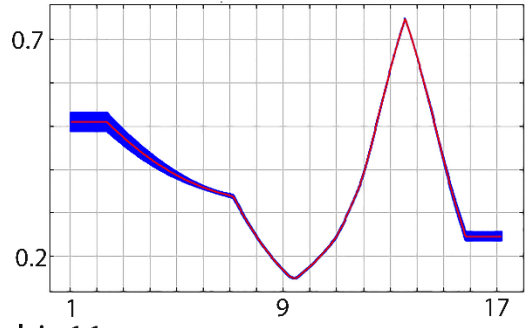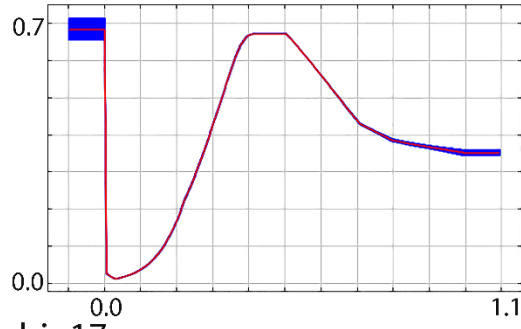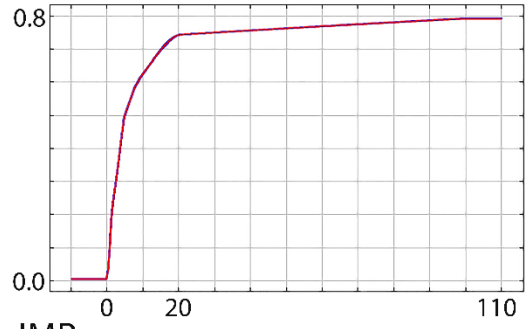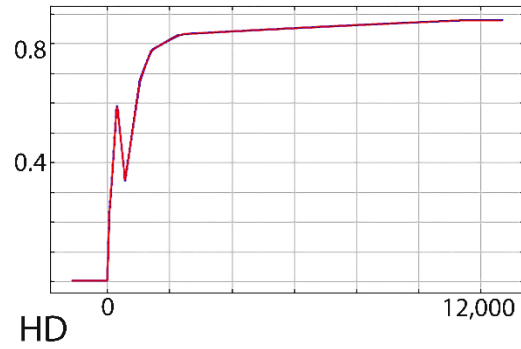

**Figure S2.** A detailed illustration of the modelling process of both the SDM and JSMD as employed in this study.

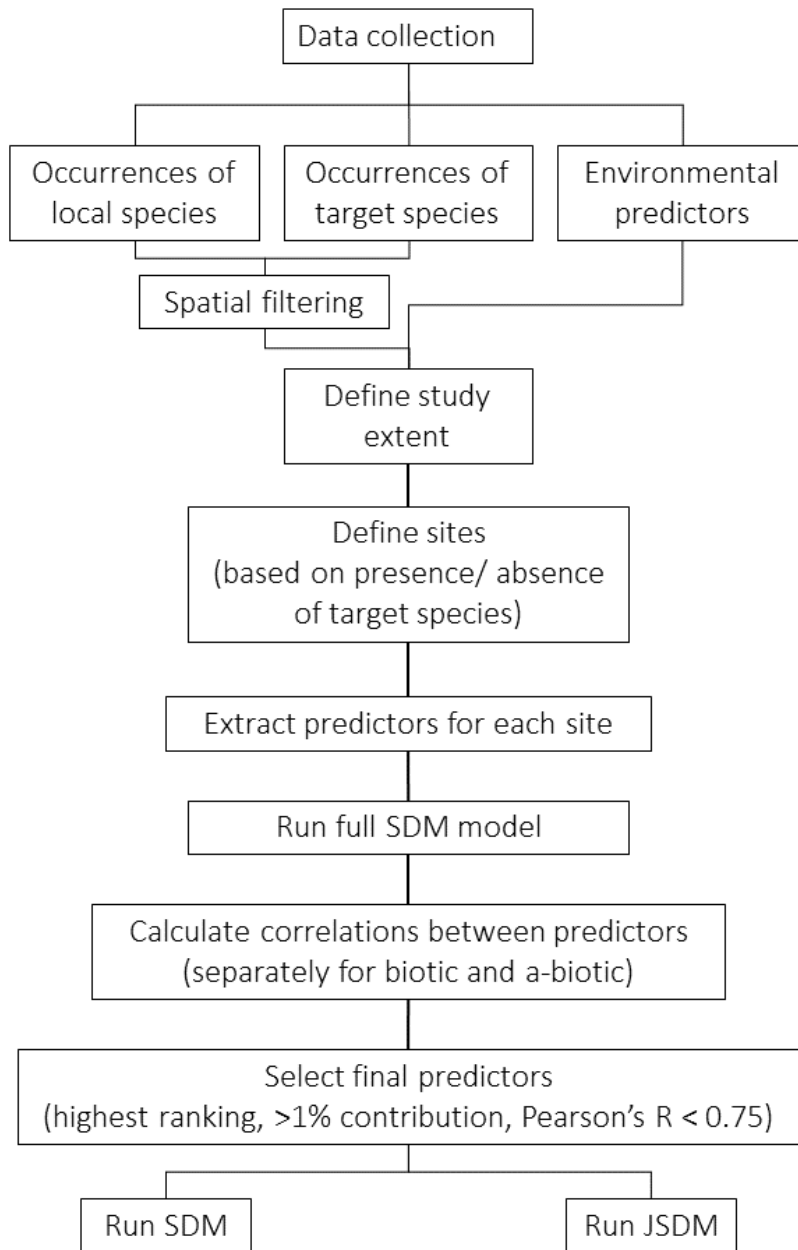

## References

1. GBIF.org. *GBIF Occurrence Download* (2015).
2. vertnet.org. *Acridotheres tristis* (2015). Available at: <http://portal.vertnet.org/search?q=acridotheres+tristis>. (Accessed: 21st October 2015)
3. Brooks, M. Southern African Bird Atlas Project 2: Full protocol records. Version 1.14. (2017).
4. Holzapfel, C., Levin, N., Hatzofe, O. & Kark, S. Colonisation of the Middle East by the invasive Common Myna *Acridotheres tristis* L., with special reference to Israel. *Sandgrouse* **28**, 44 (2006).
5. Peneaux, C. & Griffin, A. S. Opportunistic observations of travel distances in common mynas (*Acridotheres tristis*). *Canberra Bird Notes* **40**, 228–234 (2016).
6. Yaremych, S. A., Novak, R. J., Raim, A. J., Mankin, P. C. & Warner, R. E. Home range and habitat use by American Crows in relation to transmission of West Nile virus. *Wilson Bull.* 232–239 (2004).
7. Summers-Smith, D., Christie, D. . & Garcia, E. F. . House Sparrow (*Passer domesticus*). in *Handbook of the Birds of the World Alive* (eds. del Hoyo, J., Elliott, A., Sargatal, J., Christie, D. . & de Juana, E.) (Lynx Edicions, 2018).
8. Strubbe, D. & Matthysen, E. A radiotelemetry study of habitat use by the exotic Ring-necked Parakeet *Psittacula krameri* in Belgium. *Ibis (Lond. 1859)*. **153**, 180–184 (2011).
9. Pasinelli, G. Oaks (*Quercus* sp.) and only oaks? Relations between habitat structure and home range size of the middle spotted woodpecker (*Dendrocopos medius*). *Biol. Conserv.* **93**, 227–235 (2000).
10. Krištín, A. & Kirwan, G. . Common Hoopoe (*Upupa epops*). in *Handbook of the Birds of the World Alive* (eds. del Hoyo, J., Elliott, A., Sargatal, J., Christie, D. . & de Juana, E.) (Lynx Edicions, 2018).
11. Gosler, A., Clement, P. & Christie, D. . Great Tit (*Parus major*). in *andbook of the Birds of the World Alive* (eds. del Hoyo, J., Elliott, A., Sargatal, J., Christie, D. . & de Juana, E.) (Lynx Edicions, 2018).
12. Spiegel, O. & Nathan, R. Incorporating dispersal distance into the disperser effectiveness framework: frugivorous birds provide complementary dispersal to plants in a patchy environment. *Ecol. Lett.* **10**, 718–728 (2007).
13. Baptista, L. ., Trail, P. ., Orblit, H. . & Boesman, P. Rock Dove (*Columba livia*). in *Handbook of the Birds of the World Alive* (eds. del Hoyo, J., Elliott, A., Sargatal, J., Christie, D. . & de Juana, E.) (Lynx Edicions, 2018).
